# Supplementary material for: Multi-Region Radiomic Analysis Based on Multi-Sequence MRI Can Preoperatively Predict Microvascular Invasion in Hepatocellular Carcinoma
Source: PubMed Central journal article supplement (PMC9094629; doi:10.3389/fonc.2022.818681), 2022-04-27
Supplement: DataSheet_1.pdf [file DataSheet_1.pdf]

## Supplementary Materials

### Contents

#### List of Supplementary Tables:

1. Table S1 MRI Acquisition Parameters.
2. Table S2 The correlationship between selected features in T2WI-AP radiomics model in VOI<sub>interface</sub> and tumor margin.
3. Table S3 The comparison of AUCs between training and validation cohort of T2WI-AP model based on VOI<sub>interface</sub> in four classification algorithms using Delong test.
4. Table S4 The comparison of AUCs between T2WI-AP model based on VOI<sub>interface</sub> in four classification algorithms using Delong test.
5. Table S5 Results of best-sequence combinations using four algorithms.
6. Table S6 Mean dice coefficients of segmentation.

#### List of Supplementary Figure Legends:

1. Figure S1 The heatmap of AUCs in single-sequence radiomics model based on different regions using Adaboost (AB) or Random Forest (RF) algorithm.
2. Figure S2 The heatmap of AUCs in single-sequence radiomics model based on different regions using Logistic Regression (LR) or Support Vector Classifier (SVC) algorithm.

## Supplementary Tables

**Table S1 MRI Acquisition Parameters.**

| Sequence                                | Matrix  | FOV<br>(mm <sup>2</sup> ) | ST<br>(mm) | Slice<br>gap<br>(mm) | TR<br>(msec) | TE<br>(msec)        | Flip angle<br>(degrees) |
|-----------------------------------------|---------|---------------------------|------------|----------------------|--------------|---------------------|-------------------------|
| T2WI with fat<br>suppression            | 168×320 | 21×38                     | 5          | 1                    | 2300         | 79                  | 140                     |
| DWI (b=50, 800<br>sec/mm <sup>2</sup> ) | 78×128  | 21×38                     | 5          | 1                    | 6000         | 73                  | -                       |
| In-phase and<br>opposed-phase<br>T1WI   | 192×256 | 21×38                     | 5          | 1                    | 133          | 1.23<br>and<br>2.46 | 70                      |
| VIBE-T1WI                               | 182×320 | 25×38                     | 3          | 0.6                  | 3.9          | 1.4                 | 9                       |

Contrast agent: gadobenate dimeglumine (MultiHance; Bracco), at a dose of 0.2ml/kg and at a rate of 2mL/sec followed by a 20mL saline flush. T2WI, T2-weighted imaging; DWI, diffusion-weighted imaging; T1WI, T1-weighted imaging; VIBE, volumetric interpolated breath-hold examination; FOV, field of view; ST, section thickness; TR, repetition time; TE, echo time.

**Table S2 The correlation between selected features in T2WI-AP radiomics model in VOI<sub>interface</sub> and tumor margin.**

| Feature          | $\rho$ | $p$   |
|------------------|--------|-------|
| AP_glcm_IV       | 0.056  | 0.554 |
| AP_glszm_SZNUN   | 0.024  | 0.803 |
| AP_glszm_ZV      | 0.083  | 0.380 |
| T2WI_glcm_MP     | -0.315 | 0.001 |
| T2WI_gldm_DV     | -0.013 | 0.894 |
| T2WI_gldm_LDLGLE | -0.305 | 0.001 |
| T2WI_gldm_SDLGLE | -0.288 | 0.002 |

Abbreviation: AP, arterial phase; T2WI, T2-weighted imaging; IV, InverseVariance; SZNUN,

SizeZoneNonUniformityNormalized; ZV, ZoneVariance; MP, Maximum-Probability; DV, Dependence-Variance; LDLGLE, LargeDependenceLowGray-LevelEmphasis; SDLGLE, SmallDependenceLowGrayLevelEmphasis.

**Table S3 The comparison of AUCs between training and validation cohort of T2WI-AP model based on VOI<sub>interface</sub> in four classification algorithms using Delong test.**

| Algorithms | Cohort               | AUCs            | <i>p</i> |
|------------|----------------------|-----------------|----------|
| AB         | Train vs. Validation | 1.000 vs. 0.763 | 0.007    |
| LR         | Train vs. Validation | 0.917 vs. 0.711 | 0.034    |
| RF         | Train vs. Validation | 1.000 vs. 0.747 | 0.008    |
| SVC        | Train vs. Validation | 0.866 vs.0.855  | 0.751    |

Abbreviation: AB, Adaboost; LR, Logistic Regression; RF, Random Forest; SVC, Support Vector Classifier; AUC, area under the curve; T2WI, T2-weighted imaging; AP, Arterial phase.

**Table S4 The comparison of AUCs between T2WI-AP model based on VOI<sub>interface</sub> in four classification algorithms using Delong test.**

| Algorithms | Cohort     | AUCs            | <i>p</i> |
|------------|------------|-----------------|----------|
| SVC vs. AB | Train      | 0.866 vs. 1.000 | <0.001   |
|            | Validation | 0.855 vs. 0.763 | 0.602    |
| SVC vs. LR | Train      | 0.866 vs. 0.917 | 0.077    |
|            | Validation | 0.855 vs. 0.711 | 0.045    |
| SVC vs. RF | Train      | 0.866 vs. 1.000 | <0.001   |
|            | Validation | 0.855 vs. 0.747 | 0.53     |
| LR vs. AB  | Train      | 0.917 vs. 1.000 | 0.004    |
|            | Validation | 0.711 vs. 0.763 | 0.572    |
| LR vs. RF  | Train      | 0.917 vs. 1.000 | 0.004    |
|            | Validation | 0.711 vs. 0.747 | 0.743    |

|           |            |                 |       |
|-----------|------------|-----------------|-------|
| AB vs. RF | Train      | 1.000 vs. 1.000 | 1.000 |
|           | Validation | 0.763 vs. 0.747 | 0.821 |

Abbreviation: AB, Adaboost; LR, Logistic Regression; RF, Random Forest; SVC, Support Vector Classifier; AUC, area under the curve; T2WI, T2-weighted imaging; AP, Arterial phase.

**Table S5 Results of best-sequence combinations using four algorithms.**

| VOIs                           | Best-sequence combination | Classifier | AUC (TC/VC) | ACC (TC/VC) |
|--------------------------------|---------------------------|------------|-------------|-------------|
| VOI <sub>whole</sub>           | AP + HBP                  | LR         | 0.883/0.845 | 0.838/0.743 |
|                                |                           | SVC        | 0.891/0.770 | 0.838/0.686 |
|                                |                           | AB         | 0.991/0.786 | 0.963/0.686 |
|                                |                           | RF         | 1.000/0.711 | 1.000/0.686 |
| VOI <sub>periphery</sub>       | T2WI + AP                 | LR         | 0.859/0.720 | 0.800/0.657 |
|                                |                           | SVC        | 0.841/0.803 | 0.775/0.800 |
|                                |                           | AB         | 1.000/0.697 | 1.000/0.629 |
|                                |                           | RF         | 1.000/0.628 | 1.000/0.629 |
| VOI <sub>whole+periphery</sub> | T2WI + HBP                | LR         | 0.799/0.799 | 0.750/0.800 |
|                                |                           | SVC        | 0.694/0.813 | 0.700/0.714 |
|                                |                           | AB         | 0.965/0.605 | 0.900/0.571 |
|                                |                           | RF         | 0.998/0.831 | 0.975/0.743 |
| VOI <sub>interface</sub>       | T2WI + AP                 | LR         | 0.917/0.711 | 0.850/0.600 |
|                                |                           | SVC        | 0.866/0.855 | 0.863/0.800 |
|                                |                           | AB         | 1.000/0.763 | 1.000/0.686 |
|                                |                           | RF         | 1.000/0.747 | 1.000/0.686 |

Abbreviation: AB, Adaboost; LR, Logistic Regression; RF, Random Forest; SVC, Support Vector Classifier; AUC, area under the curve; T2WI, T2-weighted imaging; AP, Arterial phase; HBP, Hepatobiliary phase; TC, Training cohort; VC, Validation cohort.

**Table S6 Mean dice coefficients of segmentation.**

| VOI                            | T2WI  | T1WI  | AP    | PVP   | DP    | HBP   |
|--------------------------------|-------|-------|-------|-------|-------|-------|
| VOI <sub>whole</sub>           | 0.944 | 0.947 | 0.957 | 0.950 | 0.944 | 0.959 |
| VOI <sub>periphery</sub>       | 0.746 | 0.769 | 0.791 | 0.767 | 0.764 | 0.812 |
| VOI <sub>whole+periphery</sub> | 0.940 | 0.943 | 0.953 | 0.941 | 0.941 | 0.961 |
| VOI <sub>interface</sub>       | 0.837 | 0.835 | 0.857 | 0.847 | 0.830 | 0.861 |

Abbreviation: T2WI, T2-weighted imaging; T1WI, T1-weighted imaging; AP, Arterial phase; PVP, Portal venous phase; DP, Delayed phase; HBP, Hepatobiliary phase.

## Supplementary Figure Legends

**Figure S1** The heatmap of AUCs in single-sequence radiomics model based on different regions using Adaboost (AB) or Random Forest (RF) algorithm.

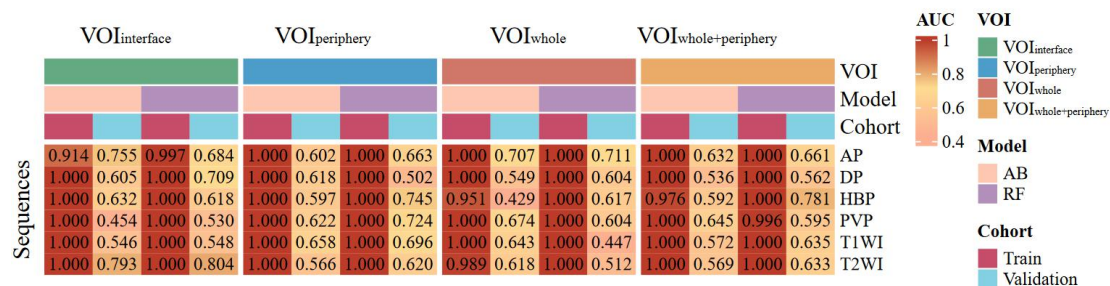

Abbreviation: AP, arterial phase; IV, InverseVariance; SZNUN, SizeZoneNonUniformityNormalized; ZV, ZoneVariance; MP, MaximumProbability; DV, Dependence-Variance; LDLGLE, LargeDependenceLowGrayLevelEmphasis; SDLGLE, SmallDependenceLow-GrayLevelEmphasis.

**Figure S2** The heatmap of AUCs in single-sequence radiomics model based on different regions using Logistic Regression (LR) or Support Vector Classifier (SVC) algorithm.

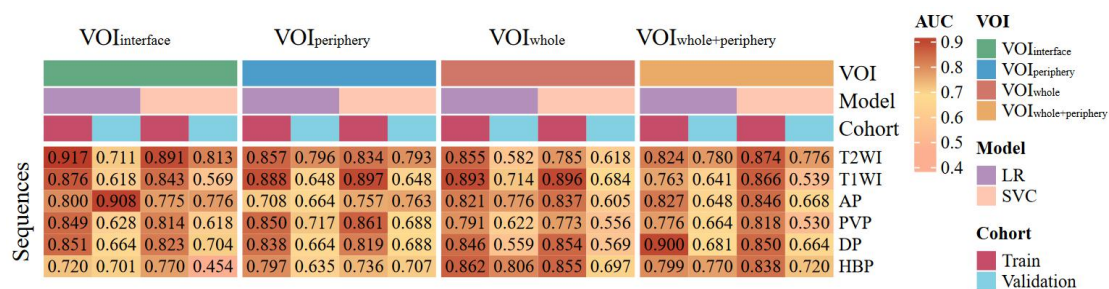

Abbreviation: AP, arterial phase; IV, InverseVariance; SZNUN, SizeZoneNonUniformityNormalized; ZV, ZoneVariance; MP, MaximumProbability; DV,

DependenceVariance; LDLGLE, LargeDependenceLowGrayLevelEmphasis; SDLGLE,  
SmallDependenceLow-GrayLevelEmphasis.
